# Supplementary material
Source: Springer Nature journal article supplement (https://www.springermedizin.de/resource/supplementary/13256_2011_1724_MOESM4_ESM.pdf/9648294)

SIGMA EXCITE 0.35T GE  
Ex: 1036  
Se: 112  
In: 4  
Dk: 57.7

SAR

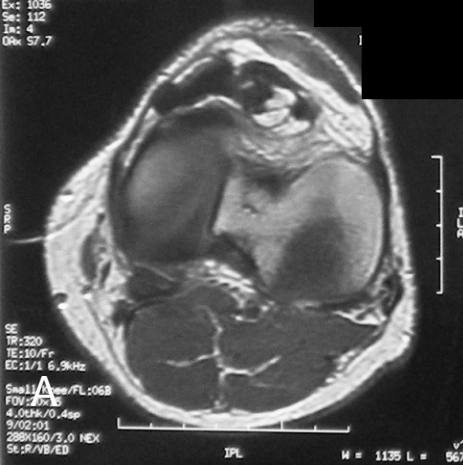

SIGMA EXCITE 0.35T GE  
Ex: 1036  
Se: 112  
In: 5  
Dk: 512.1

SAR

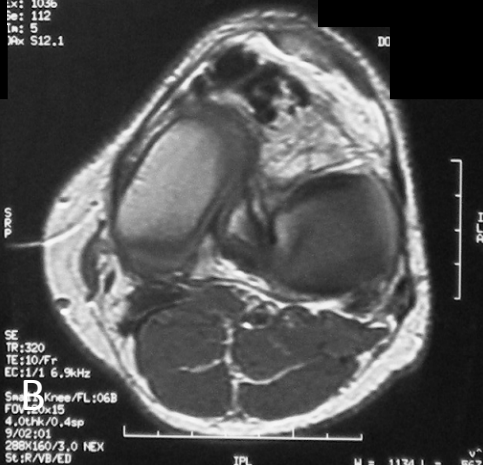

SIGMA EXCITE 0.35T GE  
Ex: 3038  
Se: 303  
In: 7  
Dk: 56.6

SAR

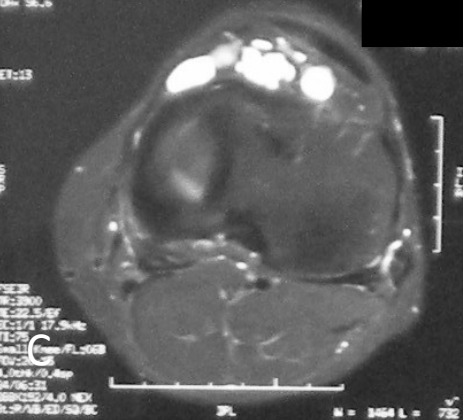

SIGMA EXCITE 0.35T GE  
Ex: 3038  
Se: 303  
In: 8  
Dk: 511.0

SAR

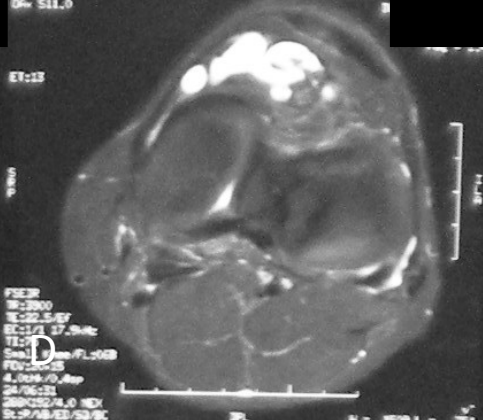

Supplement: MOESM4 [file 9648294]
